# Supplementary material for: Tendon neuroplastic training: changing the way we think about tendon rehabilitation: a narrative review
Source: PubMed Central journal article supplement — Br J Sports Med. 2015 Sep 25;50(4):209–15. doi: 10.1136/bjsports-2015-095215 (PMC4752665; doi:10.1136/bjsports-2015-095215), 2015-09-25
Supplement: bjsports-2015-095215-s1.pdf [file bjsports-2015-095215-s1.pdf]

## Supplementary file

### Method

Preliminary data contained in this supplementary file were collected using the method described below. Participants were recruited from sub-elite and elite basketball and volleyball populations and were aged over 18 years and all playing / training three times per week. If they were not able to participate in games and trainings three times per week for any reason including PT, they were not included because of the potential for activity to modify the primary motor cortex (M1) and motor control as demonstrated in pilot testing.

While habitual activity has been shown to effect the M1, no study was identified that specifically considered the type of activity and the influence on the M1 and motor drive. Thirteen physically active, healthy participants were recruited (Table 1.) All participants completed at least three sessions per week of structured activity and included a mix of elite, sub-elite and recreational athletes.

Athletes nominated their dominant leg for testing and the contralateral corticospinal excitability was tested

Table 1 Characteristics of participants in the pilot study that investigated the influence of jumping on corticospinal excitability

| Characteristics             | Description |
|-----------------------------|-------------|
| N (men)                     | 13 (9)      |
| Age years<br>(median+range) | 26 (21-37)  |

---

|                 |                                                                                                |
|-----------------|------------------------------------------------------------------------------------------------|
| BMI (mean±SD)   | 23.87±2.60                                                                                     |
| Weekly activity | Australian football, swimming, touch football, running, martial arts, volleyball and badminton |

---

BMI, body mass index

Following testing, participants were grouped according to activity type (jumping yes/no). Data were coded and all data were analysed blinded to group activity type (Table 2). Stimulus response curves were constructed (normalised to  $M_{MAX}$ ) and the slope was calculated using GraphPad Prism. Data for  $M_{MAX}$ , active motor threshold (AMT) and maximal voluntary isometric contraction (MVIC) are presented as median and range. In order to be conservative, non-parametric analyses (Mann Whitney U) were conducted on all comparisons, as the sample size was small and groups were an uneven number. Physically active people who did not participate in sports that have a jumping requirement exhibited lower corticospinal excitability, evidenced by a decrease in the slope of the stimulus response curve (higher number indicates decrease in slope) (Table 2).

Table 2 Corticospinal responses, peripheral measures and descriptions of each group

| Group by activity (jumping yes / no) | Characteristics     | M <sub>MAX</sub> | AMT     | MVIC      | Slope (AU)   |
|--------------------------------------|---------------------|------------------|---------|-----------|--------------|
| N=8 jumping participants             | 6 men               | 24.61            | 42      | 172.5     | 5.91         |
| (median+range)                       | Australian football | (21.84-27.68)    | (31-50) | (152-274) | (4.08-7.90)  |
|                                      | Martial arts        |                  |         |           |              |
|                                      | Volleyball          |                  |         |           |              |
|                                      | Badminton           |                  |         |           |              |
| N=5 non-jumping participants         | 3 men               | 21.51            | 35      | 168       | 14.04*       |
| (median+range)                       | Swimming            | (18.7-27.46)     | (31-50) | (105-183) | (9.66-17.69) |
|                                      | Touch football      |                  |         |           |              |
|                                      | Running             |                  |         |           |              |

AMT, active motor threshold; MVIC, Maximum voluntary isometric contraction; AU, arbitrary units \* denotes p=0.002

These data suggest that jumping has a profound effect on the CSE and that it is therefore important that any comparisons made between controls, those with other AKP or PT participate in jumping sports. Data were checked for the potential effect of gender and found to be non-significant (p = 0.26). There were no differences between groups for M<sub>MAX</sub>, AMT or MVIC (p < 0.05).

Based upon these data, the decision was made to recruit both men and women but only include athletes that played / trained at least three times per week in jumping sports in all studies.

Note that the larger randomised clinical trial (RCT) (Rio et al., unpublished data and van Ark et al., unpublished data) included participants aged over 16 years however, only participants aged over 18 years were offered transcranial magnetic stimulation (TMS) testing.

Athletes were asked to complete a VISA-P, a questionnaire about patellar tendon pain and function that is scored between 0 and 100 with 100 being maximal pain free function [1]. Height in centimetres (cm) using a stadiometer and weight in kilograms (kg) without foot ware were recorded and this has been described previously [2].

### **Clinical diagnosis of patellar tendinopathy**

Patellar tendinopathy (PT) in all studies was diagnosed as localised pain at the inferior pole of the patella during jumping and landing as well as during the single leg decline squat (SLDS), a reliable patellar tendon pain provocation test [3]. Grey scale ultrasound (US) was used to confirm the diagnosis by applying the following where at least one criterion had to be satisfied; presence of a hypoechoic area, increased thickness of the anterior/posterior diameter greater than six millimetres (mm) or the presence of vessels. Athletes with bilateral symptoms were asked to nominate their most painful knee on the SLDS using a numerical rating scale (NMR) 0-10 and measures of quadriceps torque were taken from this side only and the contralateral hemisphere was tested with TMS.

### **Inter-person data**

Jumping athletes were recruited and offered bilateral TMS testing. Following testing, they were assessed clinically and using US to determine the presence of tendon pain (NRS pain on SLDS) and tendon pathology (US) for sub-grouping into unilateral or bilateral tendon pain or pathology.

### **In-season intervention study - Tendon neuroplastic training**

Concealed randomisation was achieved by asking the athlete to draw an opaque sealed envelope with no external markings [4]. The envelope contained a number (either one = isometric or two = isotonic) produced by random number generation (Excel 2007©).

Data were collected as part of a RCT with two intervention arms completed over four weeks during a competitive season. The intervention was completed four times per week. There were two active intervention arms, either isometric or isotonic muscle contractions and no sham group.

Exercises were completed on a leg extension machine (Figure 1).

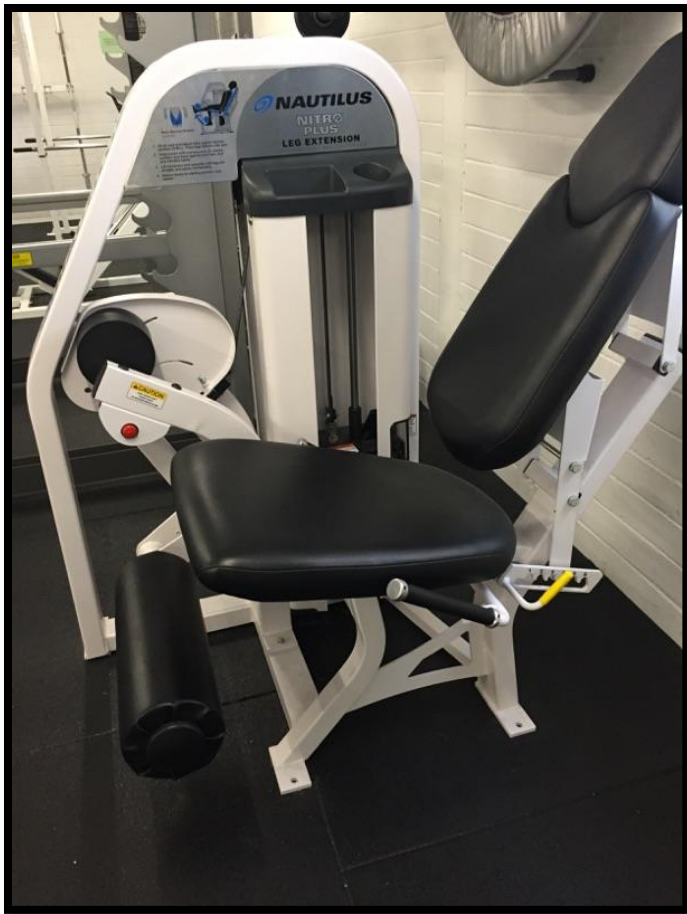

Figure 1. An example of a leg extension machine used for the intervention of quadriceps muscle contractions

Both protocols were matched for time under load and rest between sets (set at two minutes to allow muscle recovery) (Table 3) [5]. Repetition maximum (for the isotonic group) and MVIC (for the isometric group) were determined for starting loads. As muscle work during isometric exercise and isotonic exercise cannot be directly measured, protocols were matched for rating of perceived exertion on the basis of pilot studies and to avoid delayed onset muscle soreness as this was an in season study and muscle pain may negatively affect compliance or sporting participation. Furthermore, the protocol were matched for time under tension and based upon data supporting the use of external pacing to modulate corticospinal excitability and inhibition.

Auditory cues have been shown to be beneficial on the induction of neuroplasticity [6-11]. Therefore both groups received an auditory file to play on their smart phone device during their exercise sessions that provided verbal instructions and paced the muscle contractions (Table 3). The aims of this were to try to ensure timing was adhered to, provide auditory stimulation and avoid self-pacing so that the only difference between groups was muscle contraction type.

*Table 3. Protocol used in the randomised clinical trial*

|                          | Isometric group                      | Isotonic group                                                                  |
|--------------------------|--------------------------------------|---------------------------------------------------------------------------------|
| Time under tension       | 5 x 45 seconds =<br>225 seconds      | 4 x 8<br>3 seconds concentric and 4<br>seconds eccentric phase = 224<br>seconds |
| Starting load            | 80% MVIC                             | 80% 8RM                                                                         |
| Progression              | 2.5% as able                         | 2.5% as able                                                                    |
| External pacing and cues | Metronome and verbal<br>instructions | Metronome and verbal<br>instructions                                            |
| Equipment                | Leg extension machine                | Leg extension machine                                                           |
| Range                    | 60 degrees                           | Comfortable range 10 degrees –<br>100 degrees                                   |

Note: the protocol was modified from [2] to prevent delayed onset muscle soreness.

### **Transcranial magnetic stimulation**

Single pulse TMS was used to obtain stimulus response curves and paired pulse TMS technique was used to quantify SICI and these methods have been published elsewhere [2].



### **Outcome measures and statistical tests**

For the inter-person study, outcome measures were active motor threshold, CSE and SICI. For the RCT, outcome measures were short interval cortical inhibition (SICI) and VISA-P. Non-parametric tests were chosen due to small sample size.

### **Results of the inter-person study**

Bilateral data was obtained for 16 athletes (32 hemispheres). Of these, four were control participants recruited to compare SICI against the published physiological normal range for the quadriceps (50-70%) [6, 12] as it was unknown if SICI may be altered in jumping athletes. The median SICI ratio for both sides of control athletes was 56.81 (range 50.86-58.81) and there were no differences between hemispheres in control participants ( $p=0.49$ ). There were no differences between sides in control participants for the slope of the stimulus response curve, left = 7.28,  $n=4$ , right = 9.55,  $n=4$ ,  $p=0.83$ . This supported data obtained in previous studies of control participants (Rio et al., 2015 accepted) and previously published physiological ranges [12]. Two athletes for whom bilateral data was obtained were excluded (one swimmer and one rock climber). This was because significant differences were found in corticospinal excitability of athletes that regularly jumped and those that did not despite the same number of structured physical activity sessions in a week, in a pilot study of 13 athletes ( $p=0.002$ ). Therefore, fourteen athletes were included in the data provided in the paper,  $n=4$  controls and  $n=10$  with tendinopathy.

The following sub-groups emerged: -

Unilateral tendinopathy (unilateral pain with unilateral pathology)  $n=3$

Bilateral tendinopathy (bilateral pain and pathology)  $n=2$

Unilateral tendinopathy (unilateral pain with bilateral pathology)  $n=5$ .

Therefore, the question posed was - what is the effect of unilateral pain on the other side (n=8)?

**Results from randomised clinical trial – tendon neuroplastic training**

Nine athletes (seven men and two women) with either unilateral (n=5) or bilateral (n=4) PT who were taking no medication were included in the study (Table 2). This was part of a larger trial of 29 people, who were all offered inclusion in the TMS component. Nine athletes completed the study, four in the isotonic group and five in the isometric group.

*Table 2. Baseline characteristics and testing*

|   |              |        |        |        |        |       |       | Baseline |     |      |     |     |        |        |       |       |
|---|--------------|--------|--------|--------|--------|-------|-------|----------|-----|------|-----|-----|--------|--------|-------|-------|
|   | intervention | LOT sx | height | weight | BMI    | KTW L | KTW R | VISA     | Leg | SLDS | MVC | AMT | M wave | curve  | V50   | SICI  |
| M | isotonic     | 84     | 181.5  | 74     | 22.464 | 11    | 7     | 69       | R   | 8    | 202 | 26  | 26.519 | 0.1004 | 1.701 | 41.87 |
| M | isometric    | 24     | 185    | 81     | 23.667 | 13    | 8     | 13       | R   | 7    | 113 | 28  | 18.64  | 0.2165 | 1.454 | 33.82 |
| F | isometric    | 1      | 178    | 65.3   | 20.61  | 12    | 11    | 65.5     | R   | 5    | 177 | 33  | 15.482 | 0.2368 | 1.68  | 56.3  |
| F | isotonic     | 24     | 170.5  | 100.9  | 34.709 | 12    | 9     | 46       | L   | 7    | 220 | 29  | 18.381 | 0.1493 | 1.475 | 24.65 |
| M | isometric    | 36     | 188    | 81.1   | 22.946 | 12    | 11    | 76       | R   | 7    | 165 | 36  | 22.354 | 0.1283 | 1.414 | 41.12 |
| M | isotonic     | 4      | 183    | 79.7   | 23.799 | 17    | 16    | 65       | L   | 5    | 263 | 25  | 17.474 | 0.1242 | 1.389 | 79.74 |
| M | isometric    | 36     | 182.6  | 84.1   | 25.223 | 7     | 8     | 63       | L   | 7    | 152 | 35  | 24.29  | 0.1239 | 1.452 | 28.61 |

|       |          |     |       |       |        |    |    |    |   |   |       |    |        |        |       |       |
|-------|----------|-----|-------|-------|--------|----|----|----|---|---|-------|----|--------|--------|-------|-------|
| M     | isotonic | 120 | 194   | 96.5  | 25.64  | 17 | 17 | 65 | R | 9 | 221   | 38 | 22.824 | 0.1237 | 1.443 | 20.17 |
| GROUP |          | 30  | 182.8 | 81.05 | 23.733 | 12 | 10 | 65 |   | 7 | 189.5 | 31 | 18.64  | 0.1283 | 1.454 | 41.12 |

M, male. F, female. LOT sx, length of time of symptoms (months). BMI, body mass index. KTW, knee to wall (cm). SLDS, single leg decline squat. MVC, maximal voluntary isometric contraction. AMT, active motor threshold. Mwave, maximal compound wave. SICI, short interval cortical inhibition

The individual data is provided (Table 3,4) including calculated change scores for the outcome measures – VISA-P, SLDS, SICI. Median and mean are provided, though non-parametric tests were chosen due to small sample size.

*Table 3. Individual post intervention data*

|           | VISA  | SLDS | MVC | AMT   | M wave   | curve    | V50   | SICI     |
|-----------|-------|------|-----|-------|----------|----------|-------|----------|
| Isotonic  | 67    | 3    | 268 | 23    | 25.39207 | 0.05295  | 1.791 | 91.36862 |
|           | 59    | 4    | 228 | 27    | 21.98545 | 0.2336   | 1.74  | 71.2662  |
|           | 84    | 1    | 244 | 25    | 19.03453 | 0.1124   | 1.445 | 72.98601 |
|           | 73    | 3    | 280 | 30    | 24.72848 | 0.07267  | 1.532 | 82.97635 |
| Median    | 70    | 3    | 256 | 26    | 23.35697 | 0.092535 | 1.636 | 77.98118 |
| Mean      | 70.75 | 2.75 | 255 | 26.25 | 22.78513 | 0.117905 | 1.627 | 79.64929 |
| Isometric | 41    | 4    | 165 | 26    | 20.78287 | 0.2308   | 3.483 | 99.44911 |

|        |        |   |       |       |          |        |        |          |
|--------|--------|---|-------|-------|----------|--------|--------|----------|
|        | 97.5   | 2 | 188   | 33    | 16.67    | 0.335  | 1.934  | 81.55782 |
|        | 84     | 4 | 229   | 33    | 19.98445 | 0.1536 | 1.407  | 72.11755 |
|        | 72     | 2 | 264   | 35    | 21.254   | 0.245  | 1.478  | 75.788   |
|        | 78     | 3 | 210   | 33    | 20.42    | 0.247  | 1.71   | 52.44907 |
| Median | 78     | 3 | 208.5 | 33    | 20.38366 | 0.2379 | 1.706  | 75.788   |
| Mean   | 73.625 | 3 | 211.5 | 31.75 | 19.67283 | 0.2411 | 2.0755 | 76.27231 |

MVC, maximal voluntary isometric contraction. AMT, active motor threshold. Mwave, maximal compound wave. SICI, short interval cortical inhibition

*Table 4. Change scores pre and post intervention*

|          | VISA | SLDS | MVC   | % MVC<br>change | AMT  | M wave<br>curve | V50      | SICI   |          |
|----------|------|------|-------|-----------------|------|-----------------|----------|--------|----------|
| Isotonic | -2   | 5    | 66    | 32.67327        | -3   | -1.12718        | -0.04745 | 0.09   | 49.49833 |
|          | 13   | 3    | 8     | 3.636364        | -2   | 3.604896        | 0.0843   | 0.265  | 46.61606 |
|          | 19   | 4    | 67.82 | 25.78707        | 0    | 1.56073         | -0.0118  | 0.056  | -4.32399 |
|          | 8    | 6    | 59    | 26.69683        | -8   | 1.904929        | -0.05103 | 0.089  | 62.81073 |
| Median   | 10.5 | 4.5  | 62.5  | 26.24195        | -2.5 | 1.732829        | -0.02963 | 0.0895 | 46.61606 |

|           |      |   |    |          |       |          |         |         |          |
|-----------|------|---|----|----------|-------|----------|---------|---------|----------|
| Isometric | 28   | 3 | 52 | 46.0177  | -2    | 2.142729 | 0.0143  | 2.029   | 65.6265  |
|           | 32   | 3 | 11 | 6.214689 | 0     | 1.18803  | 0.0982  | 0.254   | 25.25372 |
|           | 8    | 3 | 64 | 38.78788 | -3    | -2.36908 | 0.0253  | -0.007  | 30.9979  |
|           | 9    | 5 | 28 | 13.7931  | -2.5  | 1.665379 | 0.0198  | 1.1415  | 56.12128 |
|           | 15   | 4 | 30 | 16.66667 | 0     | -0.16    | 0.074   | 0.245   | 23.84107 |
| Median    | 18.5 | 3 | 40 | 26.29049 | -2.25 | 1.426704 | 0.02255 | 0.69775 | 43.55959 |

The individual SICI data following the RCT is provided (Table AA5).

*Table AA5. Individual pre and post cortical inhibition*

|                  | Pre (%) | Post (%) | Change (%) |
|------------------|---------|----------|------------|
| <b>Isometric</b> | 33.82   | 99.45    | 65.63      |

|                 |       |          |                    |
|-----------------|-------|----------|--------------------|
| 2               | 56.30 | 81.56    | 25.25              |
| 3               | 41.12 | 72.12    | 31.00              |
| 4               | 24.26 | 75.79    | 56.12              |
| 5               | 28.61 | 52.45    | 23.84              |
| Group<br>median | 33.82 | 75.79    | 43.56 <sup>^</sup> |
| <b>Isotonic</b> | 41.87 | 91.36862 | 49.49833           |
| 1               | 24.65 | 71.2662  | 46.61606           |
| 2               | 77.31 | 72.98601 | -4.32399           |
| 3               | 20.17 | 82.97635 | 62.81073           |
| 4               |       |          |                    |
| Group<br>median | 33.26 | 77.98    | 46.62 <sup>#</sup> |

<sup>^</sup> p=0.06, <sup>#</sup> p=0.25

1. Visentini, P.J., et al., *The VISA score: an index of severity of symptoms in patients with jumper's knee (patellar tendinosis)*. Victorian Institute of Sport Tendon Study Group. Journal of science and medicine in sport / Sports Medicine Australia, 1998. **1**(1): p. 22-8.
2. Rio, E., et al., *Isometric exercise induces analgesia and reduces inhibition in patellar tendinopathy*. Br J Sports Med, 2015.
3. Purdam, C., et al., *Discriminative ability of functional loading tests for adolescent jumper's knee*. Physical Therapy in Sport, 2003. **4**(1): p. 3-9.
4. Schulz, K.F. and D.A. Grimes, *Allocation concealment in randomised trials: defending against deciphering*. Lancet, 2002. **359**(9306): p. 614-8.
5. Ahtiainen, J.P., et al., *Muscle hypertrophy, hormonal adaptations and strength development during strength training in strength-trained and untrained men*. Eur J Appl Physiol, 2003. **89**(6): p. 555-63.
6. Goodwill, A.M., A.J. Pearce, and D.J. Kidgell, *Corticospinal plasticity following unilateral strength training*. Muscle Nerve, 2012. **46**(3): p. 384-93.
7. Hendy, A.M., M. Spittle, and D.J. Kidgell, *Cross education and immobilisation: mechanisms and implications for injury rehabilitation*. J Sci Med Sport, 2012. **15**(2): p. 94-101.
8. Kidgell, D.J. and A.J. Pearce, *Corticospinal properties following short-term strength training of an intrinsic hand muscle*. Hum Mov Sci, 2010. **29**(5): p. 631-41.
9. Kidgell, D.J., M.A. Stokes, and A.J. Pearce, *Strength training of one limb increases corticospinal excitability projecting to the contralateral homologous limb*. Motor Control, 2011. **15**(2): p. 247-66.
10. Latella, C., D.J. Kidgell, and A.J. Pearce, *Reduction in corticospinal inhibition in the trained and untrained limb following unilateral leg strength training*. Eur J Appl Physiol, 2012. **112**(8): p. 3097-107.
11. Weier, A.T., A.J. Pearce, and D.J. Kidgell, *Strength training reduces intracortical inhibition*. Acta Physiol (Oxf), 2012. **206**(2): p. 109-19.
12. Weier, A.T., A.J. Pearce, and D.J. Kidgell, *Strength training reduces intracortical inhibition*. Acta physiologica, 2012. **206**(2): p. 109-19.
